# Supplementary material for: Discrimination of Cancer Stem Cell Markers ALDH1A1, BCL11B, BMI-1, and CD44 in Different Tissues of HNSCC Patients
Source: MDPI journal article supplement (doi:10.3390/curroncol28040241), 2021-07-19
Supplement: s1 [file s1]

Supplemental Material

# Discrimination of Cancer Stem Cell Markers ALDH1A1, BCL11B, BMI-1, and CD44 in Different Tissues of HNSCC Patients

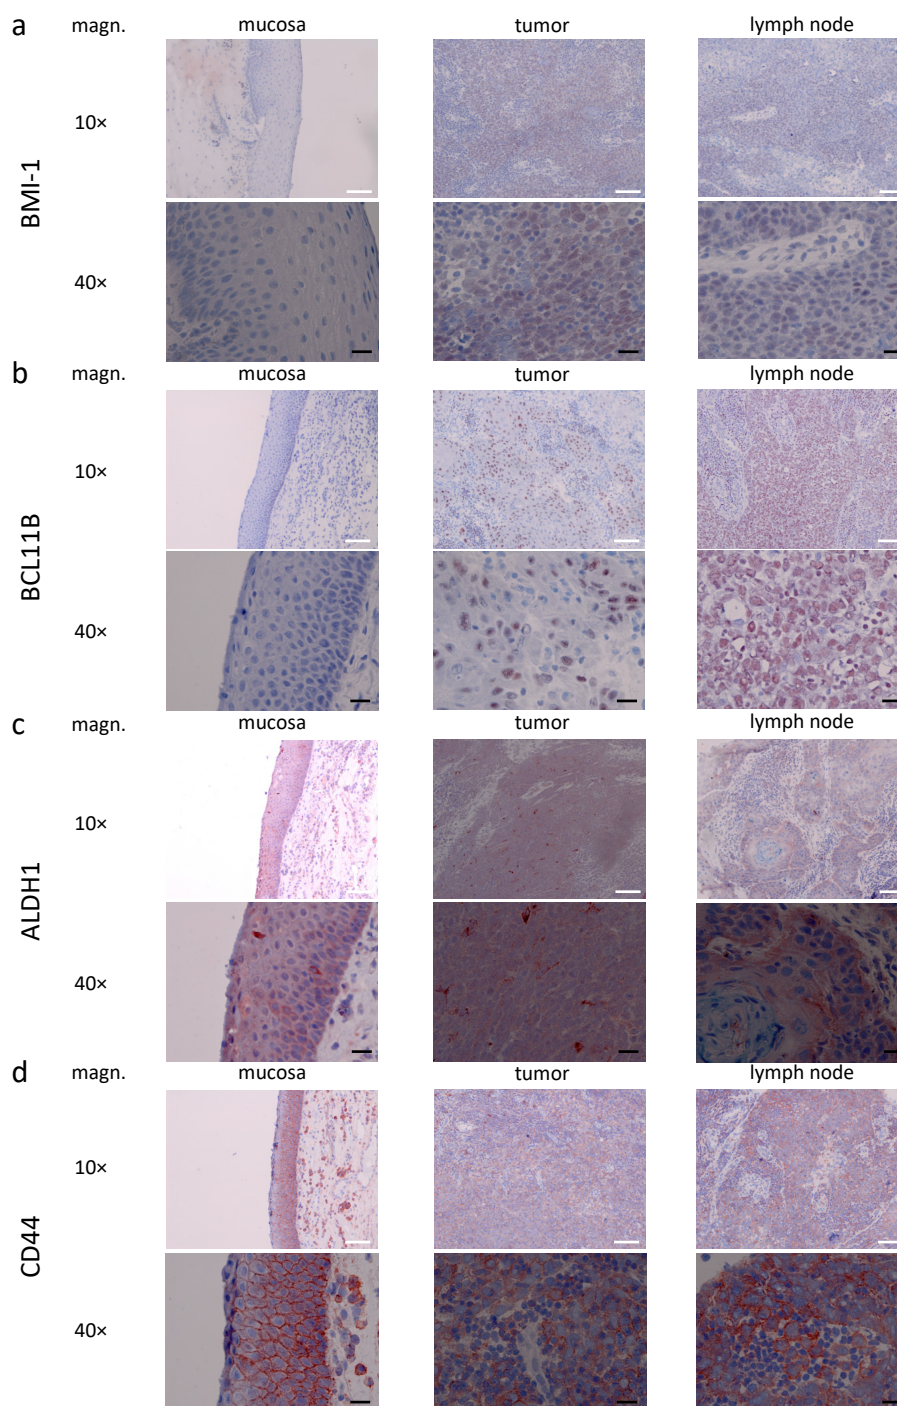

**Figure S1.** Examples of high expression patterns of CSC markers ALDH1, BCL11B, BMI-1, and CD44 in primary tumor, lymph node metastasis and healthy mucosa within the cohort. Shown are representative examples of BMI-1 (a), BCL11B (b), ALDH1 (c) and CD44 (d) expression (10× and 40× magnification) in HNSCC. White bar in 10× magnification equals 100 μm, black bar in 40× magnification equals 20 μm. Samples from the cohort with high IHC scores regardless of HPV status were chosen. ALDH1, BCL11B, BMI-1, and CD44 staining is red-brown, nuclei and cytoplasm are counter-stained with hemalaun (blue).
